# Supplementary material for: Silver(I) ion detection in aqueous media based on “off-on” fluorescent probe
Source: Royal Society of Chemistry journal article supplement (doi:10.1039/c2ay05714j), 2011-12-20
Supplement: c2ay05714j.pdf [file c2ay05714j.pdf]

## Supporting Information

### Silver(I) ion detection in aqueous media based on “off-on” fluorescent probe

Chunwei Yu,<sup>a, d</sup> Jun Zhang,<sup>b</sup> Mingyu Ding<sup>c</sup> and Lingxin Chen<sup>a\*</sup>

<sup>a</sup> *Key Laboratory of Coastal Zone Environmental Processes, CAS; Shandong Provincial Key Laboratory of Coastal Zone Environmental Processes; Yantai Institute of Coastal Zone Research, Chinese Academy of Sciences, Yantai, China*

<sup>b</sup> *School of Tropical and Laboratory Medicine, Hainan Medical University, Haikou 571101, China*

<sup>c</sup> *Department of Chemistry, Tsinghua University, Beijing 100084, China*

<sup>d</sup> *Graduate University of Chinese Academy of Sciences, Beijing 100049, China*

\* *Corresponding author: Tel./Fax: +86 535 2109130.*

*E-mail address: lxchen@yic.ac.cn (L. Chen).*

## Table of contents

### 1. Experimental

|                                                        |   |
|--------------------------------------------------------|---|
| Apparatus and reagents.....                            | 3 |
| General procedure for spectroscopic measurements ..... | 3 |
| Synthesis of compounds .....                           | 3 |

### 2. NMR and MS spectra of compound **2**, **3**, **H1** and **H2**

|                                                                         |    |
|-------------------------------------------------------------------------|----|
| <b>Fig. S1</b> ESI-MS mass spectra of compound <b>H1</b> .....          | 6  |
| <b>Fig. S2</b> <sup>1</sup> H NMR spectrum of compound <b>H1</b> .....  | 6  |
| <b>Fig. S3</b> <sup>13</sup> C NMR spectrum of compound <b>H1</b> ..... | 7  |
| <b>Fig. S4</b> ESI-MS mass spectra of compound <b>H2</b> .....          | 7  |
| <b>Fig. S5</b> <sup>1</sup> H NMR spectrum of compound <b>H2</b> .....  | 8  |
| <b>Fig. S6</b> <sup>13</sup> C NMR spectrum of compound <b>H2</b> ..... | 8  |
| <b>Fig. S7</b> ESI-MS mass spectra of compound <b>2</b> .....           | 9  |
| <b>Fig. S8</b> <sup>1</sup> H NMR spectrum of compound <b>2</b> .....   | 9  |
| <b>Fig. S9</b> <sup>13</sup> C NMR spectrum of compound <b>2</b> .....  | 10 |
| <b>Fig. S10</b> ESI-MS mass spectra of compound <b>3</b> .....          | 10 |
| <b>Fig. S11</b> <sup>1</sup> H NMR spectrum of compound <b>3</b> .....  | 11 |
| <b>Fig. S12</b> <sup>13</sup> C NMR spectrum of compound <b>3</b> ..... | 11 |

### 3. Supplementary spectral data

|                                                                                                                                                                                                                                                         |    |
|---------------------------------------------------------------------------------------------------------------------------------------------------------------------------------------------------------------------------------------------------------|----|
| <b>Fig. S13</b> Influences of pH on the fluorescence spectra of <b>H1</b> (10 μM) and <b>H1</b> (10 μM) plus Ag <sup>+</sup> (50 μM) in the ethanol–water solution (4:1, v/v). The pH was modulated by adding 1 M HCl or 1 M NaOH in HEPES buffers..... | 12 |
| <b>Fig. S14</b> The Job's plot indicating the 1:1 stoichiometry for <b>H1</b> -Ag <sup>+</sup> complex.....                                                                                                                                             | 12 |
| <b>Fig. S15</b> Benesi-Hildebrand plot of <b>H1</b> , assuming 1:1 stoichiometry for association between <b>H1</b> and Ag <sup>+</sup> .....                                                                                                            | 13 |
| <b>Fig. S16</b> Effect of water content on the fluorescence intensity of <b>H1</b> (10 μM) upon addition of Ag <sup>+</sup> (10 μM) at pH 6.5 .....                                                                                                     | 13 |
| <b>Table 1</b> Results of the sample analysis .....                                                                                                                                                                                                     | 14 |

## 1. Experimental

### Apparatus and reagents

$^1\text{H}$  NMR and  $^{13}\text{C}$  NMR spectra were obtained on a Bruker WM-300 spectrometer, and chemical shifts were given in ppm from tetramethylsilane (TMS). Melting points were measured with a WRS-1B digital melting point apparatus (Shanghai, China). Electrospray ionization (ESI) spectroscopy was performed on a Thermo TSQ Quantum Mass Spectrometer. Fluorescence emission spectra were conducted on a HORIBA Fluoromax-4 spectrofluorometer. The pH measurements were carried out on a PHS-3C meter.

Doubly distilled water was used throughout the experiments. All the materials were used as received.

### General procedure for spectroscopic measurements

A stock solution of **H1** (1.0 mM) was prepared in DMSO. To 5 mL glass tubes, 0.050 mL **H1** (1.0 mM) and a proper amount of  $\text{Cu}^{2+}$  stock solution (1.0 mM) were added subsequently and then diluted with ethanol/HEPES buffer (8:2, v/v, pH 6.5, 50 mM). The resulting solution was mixed thoroughly. For all measurements, excitation and emission slit widths were 7 nm and 3 nm, respectively, excitation wavelength was 370 nm.

### Synthesis of compound 2, 3, H1, H2

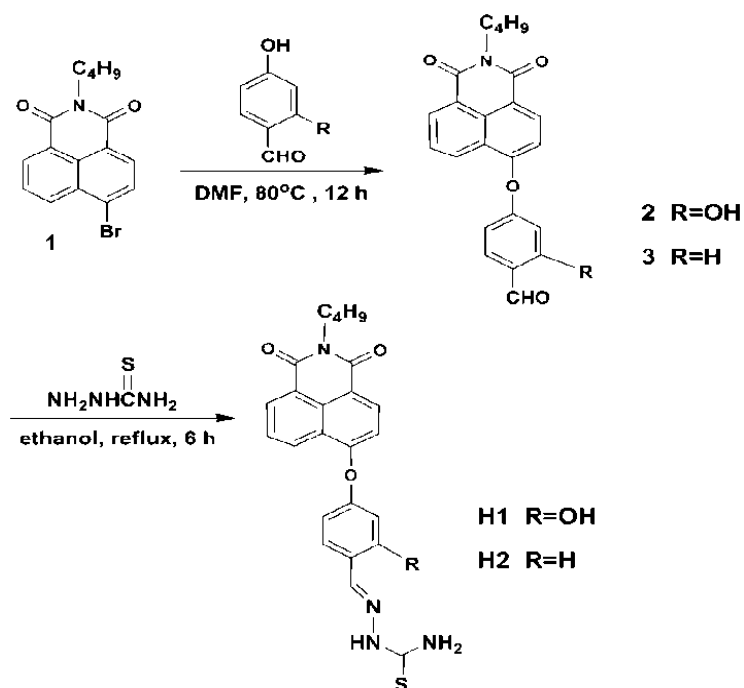

### Compound **2**

Under N<sub>2</sub> gas, compound **1** (300 mg, 0.90 mmol) and K<sub>2</sub>CO<sub>3</sub> (500 mg, 3.62 mmol) were combined in DMF (10 mL) and stirred. 2, 4-dihydroxybenzaldehyde (130 mg, 0.9 mmol) in DMF (10 mL) was added dropwise. The reaction mixture was stirred at 80 °C for 12 h, filtered through Celite and the solvent was evaporated under reduced pressure, purification with silica gel column chromatography (CH<sub>2</sub>Cl<sub>2</sub>/petroleum ether=15:1, v/v) afforded as a yellow solid. Yields: 245 mg (70 %). <sup>1</sup>H NMR (δ: ppm, CDCl<sub>3</sub>): 11.37 (s, 1H, CHO), 9.85 (s, 1H, OH), 8.65-8.67 (d, 1H, ArH), 8.56-8.57 (d, 1H, ArH), 8.44-8.46 (d, 1H, ArH), 7.76-7.79 (t, 1H, ArH), 7.59-7.61 (d, 1H, ArH), 7.26-7.27 (t, 1H, ArH), 6.73-6.76 (d, 1H, ArH), 6.61-6.62 (d, 1H, ArH), 4.18-4.21 (t, 2H, -NCH<sub>2</sub>), 1.70-1.76 (m, 2H, CH<sub>2</sub>), 1.42-1.49 (m, 2H, CH<sub>2</sub>), 0.97-1.00 (t, 3H, CH<sub>3</sub>). <sup>13</sup>C NMR (δ: ppm, CDCl<sub>3</sub>): 194.94 (CHO), 164.08, 163.48 (C=O), 156.48, 136.03, 132.55, 132.25, 132.05, 131.03, 129.81, 128.08, 127.19, 124.74, 123.03, 119.12, 117.62, 115.10, 110.73, 106.80, 40.30, 30.23, 20.39, 13.85. MS (ESI) m/z: 388.11 [M-H]<sup>-</sup>

### Compound **3**

Under N<sub>2</sub> gas, compound **1** (500 mg, 1.5 mmol) and K<sub>2</sub>CO<sub>3</sub> (900 mg, 6.52 mmol) were combined in DMF (50 mL) and stirred. 4-hydroxy benzaldehyde (220 mg, 1.8 mmol) in DMF (10 mL) was added dropwise. The reaction mixture was stirred at 80 °C for 12 h. The mixture was cooled and poured into ice-water. The precipitate produced was filtered and further purified by recrystallization from ethanol. Yields: 448 mg (80 %). <sup>1</sup>H NMR (δ: ppm, CDCl<sub>3</sub>): 10.03 (s, 1H, CHO), 8.67-8.69 (d, 1H, ArH), 8.53-8.57 (m, 2H, ArH), 8.00 (t, 1H, ArH), 7.98-7.99 (t, 1H, ArH), 7.78-7.81 (m, 1H, ArH), 7.29-7.30 (t, 1H, ArH), 7.28 (s, 1H, ArH), 7.14-7.16 (d, 1H, ArH), 4.18-4.22 (t, 2H, -NCH<sub>2</sub>), 1.71-1.77 (m, 2H, CH<sub>2</sub>), 1.43-1.51 (m, 2H, CH<sub>2</sub>), 0.98-1.01 (t, 3H, CH<sub>3</sub>). <sup>13</sup>C NMR (δ: ppm, CDCl<sub>3</sub>): 190.50 (CHO), 164.12, 163.52 (C=O), 160.89, 157.54, 133.12, 132.36, 132.23, 132.05, 129.80, 128.15, 127.05, 124.48, 122.96, 119.77, 118.47, 113.50, 40.27, 30.24, 20.39, 13.85. MS (ESI) m/z: 374.13 [M+H]<sup>+</sup>.

### Compound **H1**

Under N<sub>2</sub> gas, compound **2** (582 mg, 1.5 mmol) and thiosemicarbazide (164 mg, 1.8 mmol) were combined in ethanol (50 mL). The reaction solution was refluxed for 6 h and stirred for another 1 h at room temperature to form a lot of white precipitate. The solid was filtrated,

washed with ethanol three times. Crude product was purified by recrystallization from ethanol to give **H1** (554 mg, 80 %).  $^1\text{H}$  NMR ( $\delta$ : ppm, DMSO- $d_6$ ): 11.41 (s, 1H, OH), 10.34 (s, 1H, NH), 8.58-8.60 (d, 1H, ArH), 8.52- 8.55 (d, 1H, ArH), 8.41-8.43 (d, 1H, ArH), 8.38 (s, 1H, N=CH), 8.11-8.12 (s, 2H, NH<sub>2</sub>), 7.96 (s, 1H, ArH), 7.86-7.90 (t, 1H, ArH), 7.15-7.18 (d, 1H, ArH), 6.72-6.74 (d, 1H, ArH), 6.71 (s, 1H, ArH), 4.02-4.05 (t, 2H, CH<sub>2</sub>), 1.59-1.64 (m, 2H, CH<sub>2</sub>), 1.32-1.39 (m, 2H, CH<sub>2</sub>), 0.92-0.95 (t, 3H, CH<sub>3</sub>).  $^{13}\text{C}$  NMR ( $\delta$ : ppm, DMSO- $d_6$ ): 178.14 (C=S); 163.84, 163.20 (C=O); 158.51, 158.42, 157.51, 138.97, 133.03, 131.92, 129.39, 129.08, 128.57, 127.69, 123.93, 122.65, 118.44, 117.22, 112.88, 111.62, 107.62 (ArC); 56.49, 30.14, 20.27, 14.18. MS (ESI): 461.01 [M]<sup>-</sup>, 922.60 [2M]<sup>-</sup>

### Compound **H2**

Under N<sub>2</sub> gas, compound **3** (560 mg, 1.5 mmol) and thiosemicarbazide (164 mg, 1.8 mmol) were combined in ethanol (50 mL). The reaction solution was refluxed for 6 h and formed a lot of white precipitate. The solid was filtrated, washed with hot ethanol three times to give **H1** (468 mg, 70 %). Mp: 240.9-241.4°C;  $^1\text{H}$  NMR ( $\delta$ : ppm, DMSO- $d_6$ ): 11.48 (s, 1H, NH), 8.65-8.67 (d, 1H, ArH), 8.57-8.59 (d, 1H, ArH), 8.43-8.45 (d, 1H, ArH), 8.20 (b, 1H, NH), 8.12 (s, 1H, HC=N), 8.05 (b, 1H, NH), 7.96-7.98 (d, 2H, ArH), 7.91-7.93 (t, 1H, ArH), 7.31-7.32 (d, 2H, ArH), 7.10-7.12 (d, 1H, ArH), 4.04-4.07 (t, 2H, CH<sub>2</sub>), 1.59-1.65 (m, 2H, CH<sub>2</sub>), 1.32-1.39 (m, 2H, CH<sub>2</sub>), 0.92-0.94 (t, 3H, CH<sub>3</sub>).  $^{13}\text{C}$  NMR ( $\delta$ : ppm, DMSO- $d_6$ ): 178.48 (C=S); 163.85, 163.20 (C=O); 158.83, 156.40, 141.63, 133.07, 131.99, 131.93, 129.99, 129.40, 128.58, 127.66, 123.86, 122.63, 120.98, 117.08, 112.35, 55.38, 30.14, 20.26, 14.18. MS (ESI): 445.20 [M-H]<sup>-</sup>, 890.95 [2M-H]<sup>-</sup>

## 2. NMR and MS spectra of compound 2, 3, H1 and H2

Fig. S1

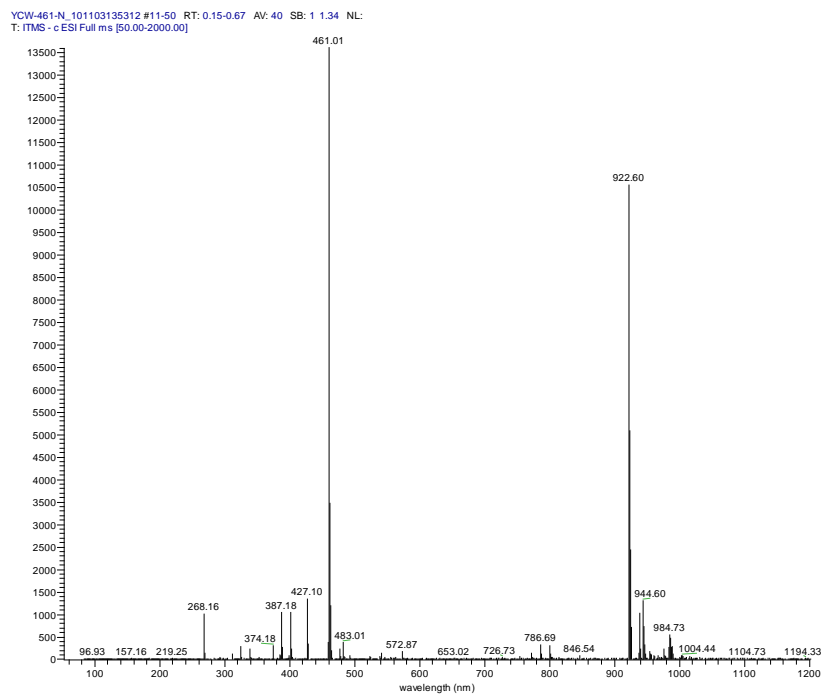

Fig. S2

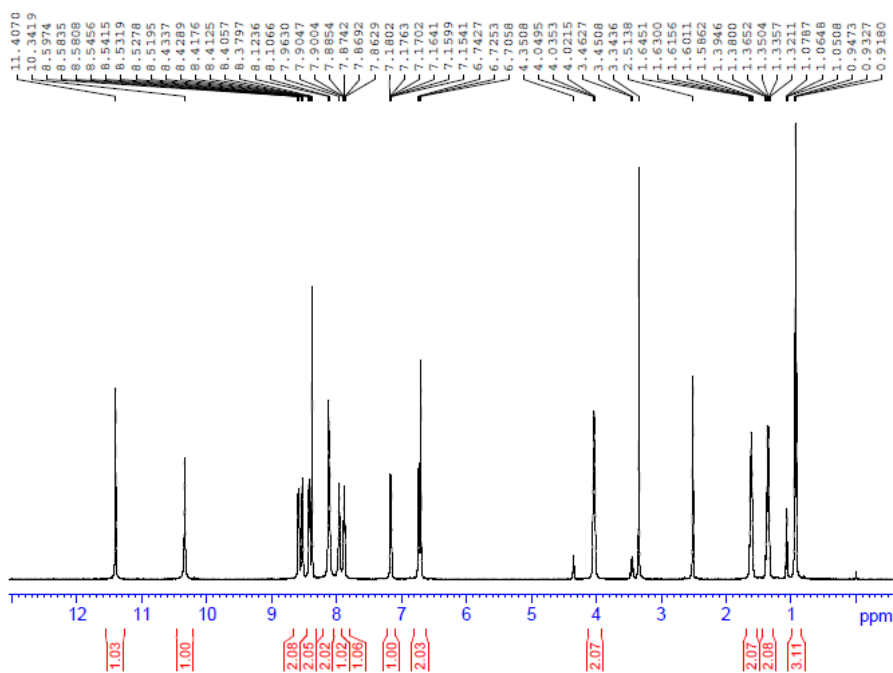

Fig. S3

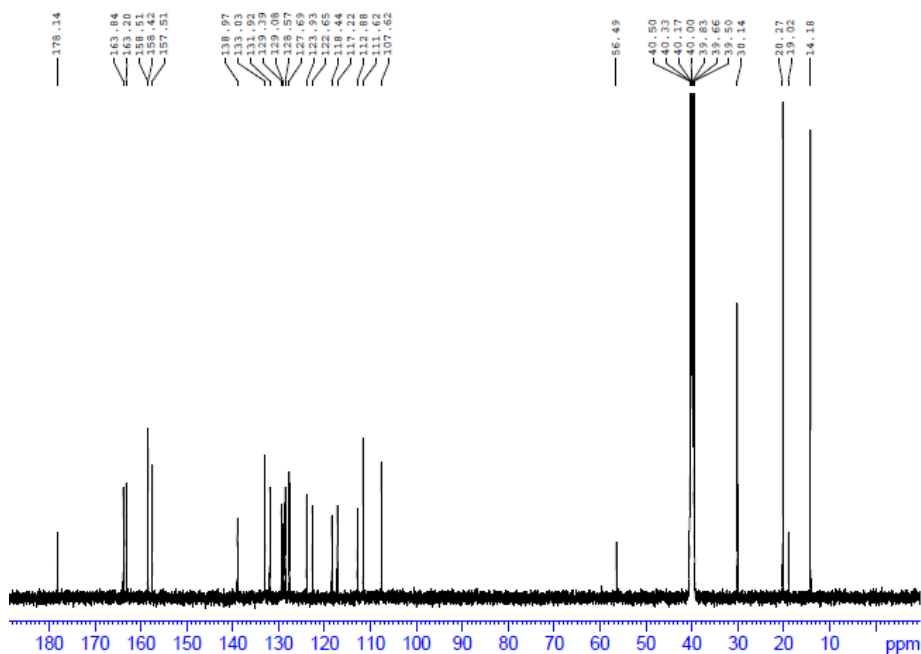

Fig. S4

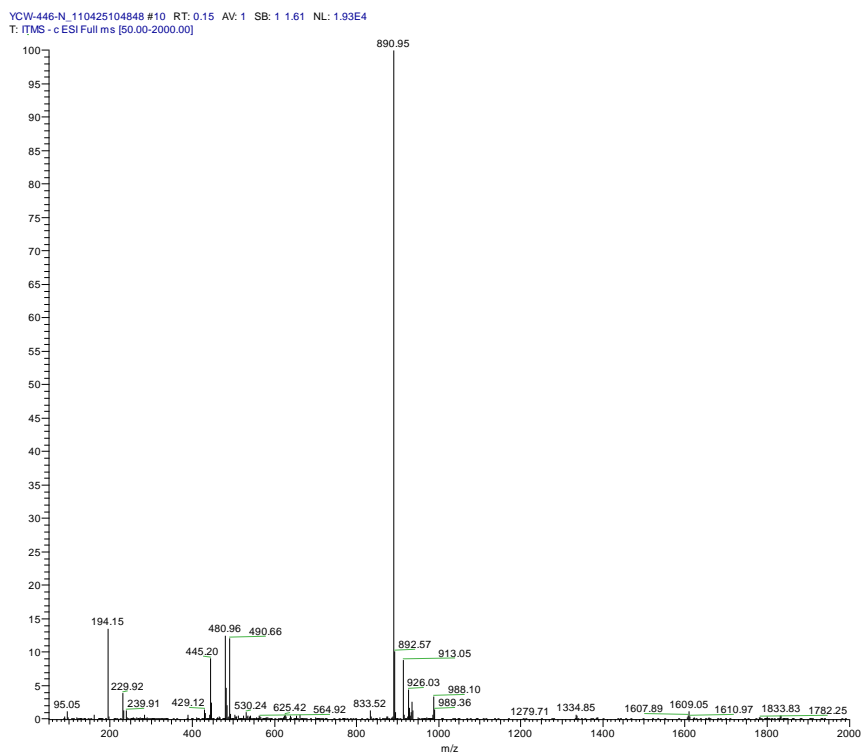

Fig. S5

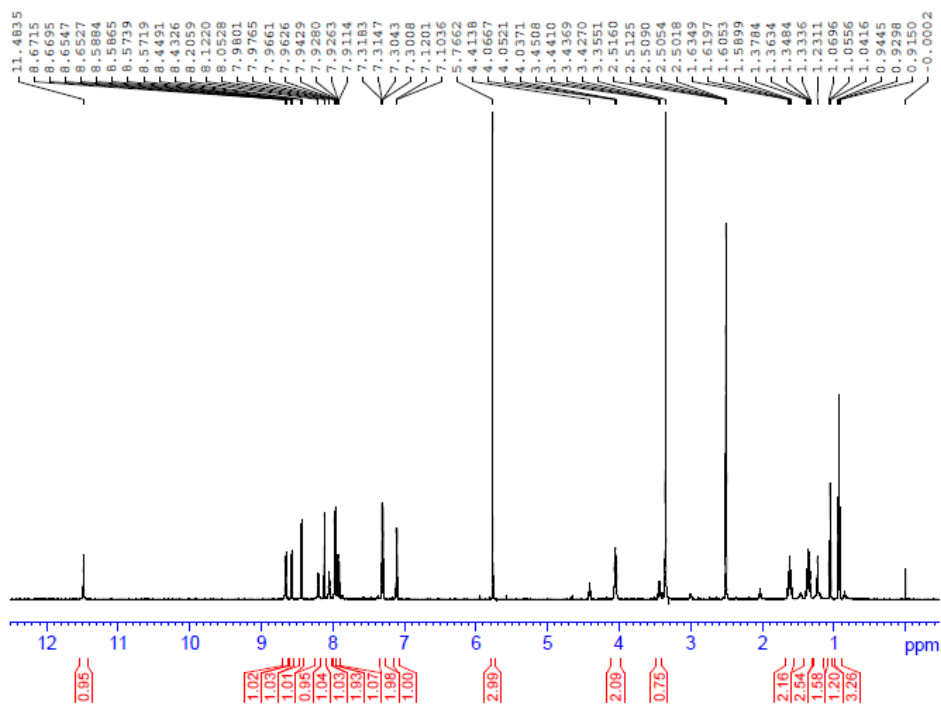

Fig. S6

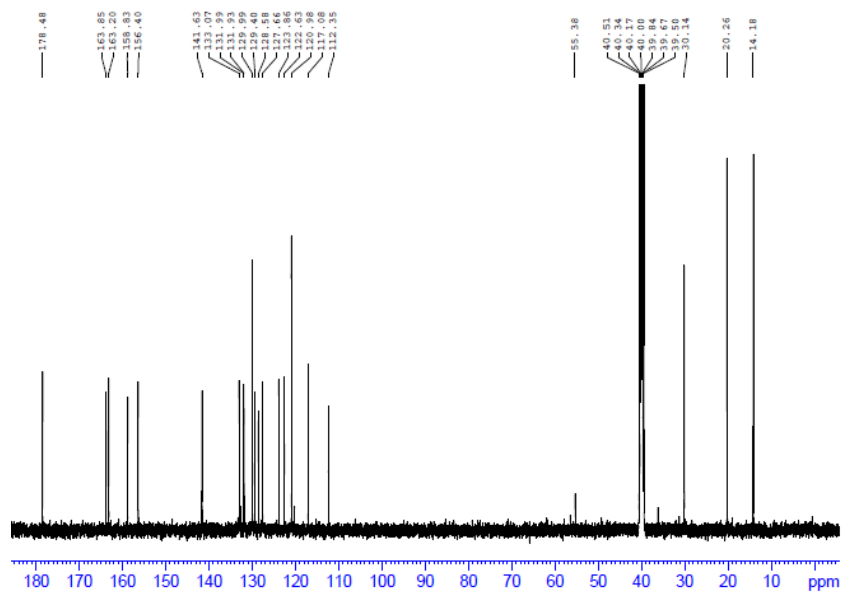



**Fig. S7**

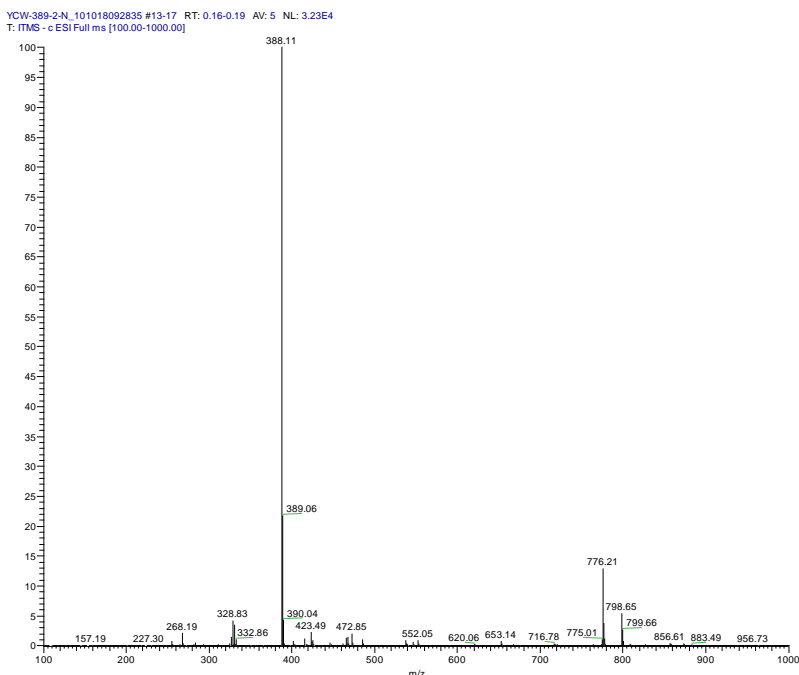

**Fig. S8**

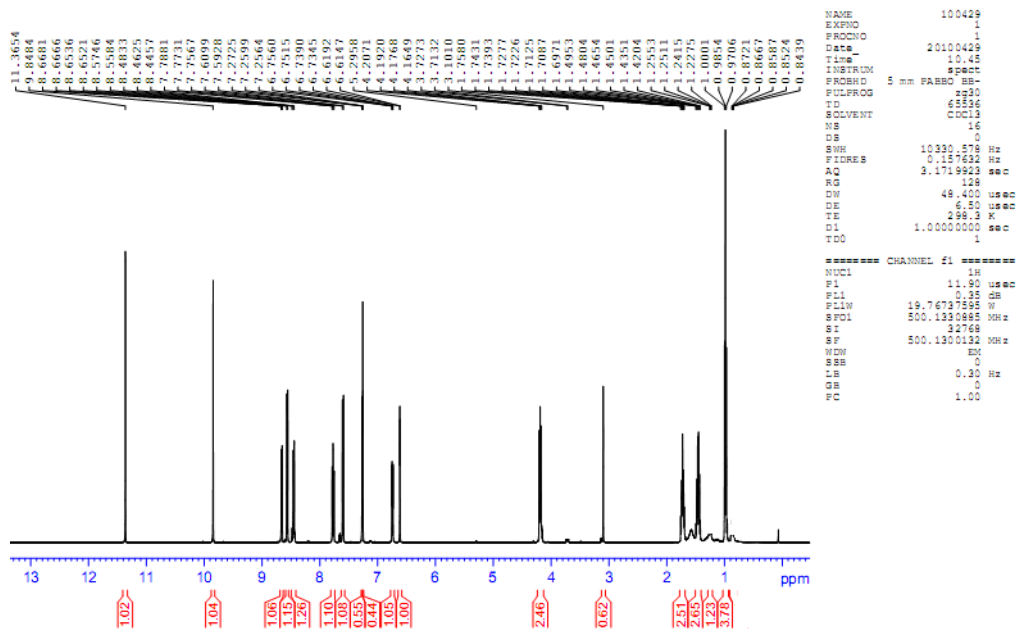

**Fig. S9**

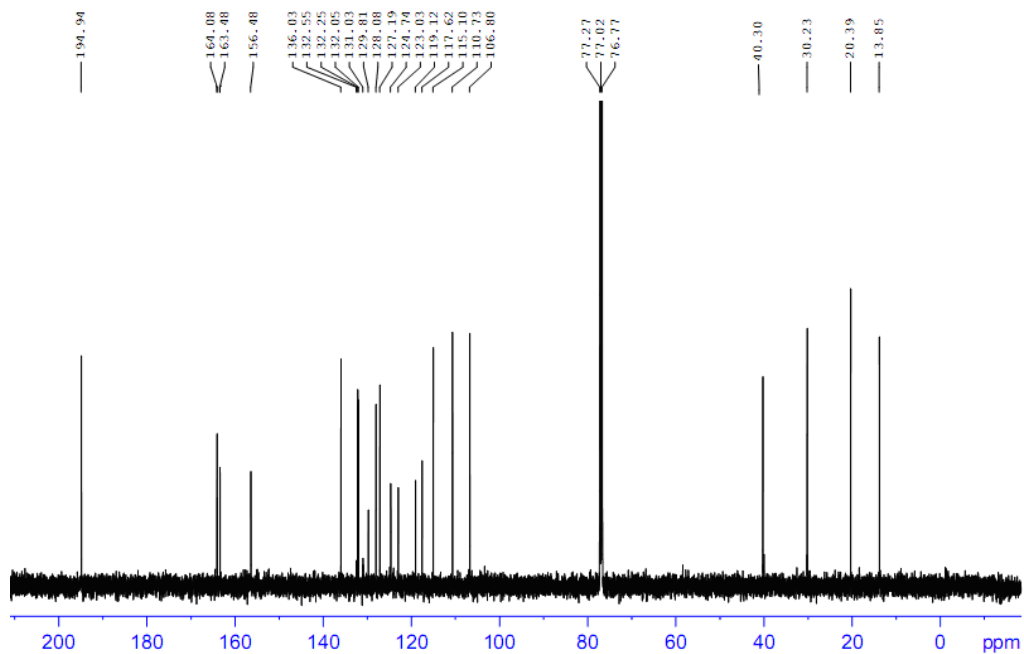

**Fig. S10**

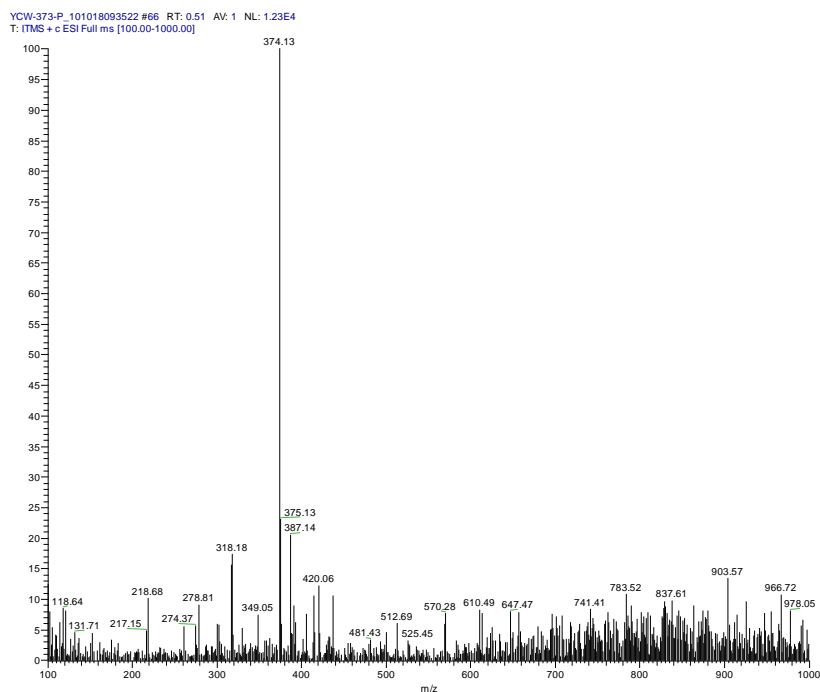

Fig. S11

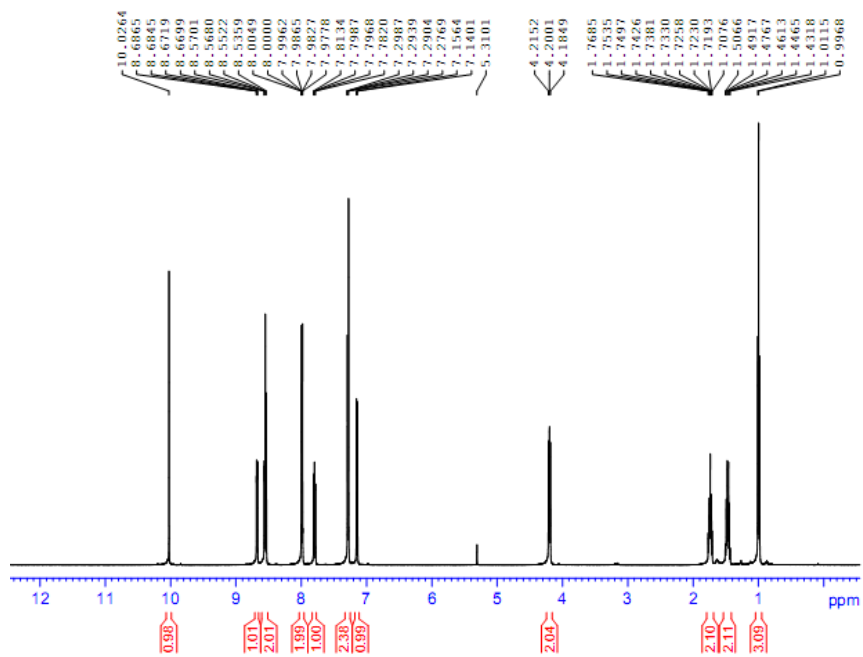

Fig. S12

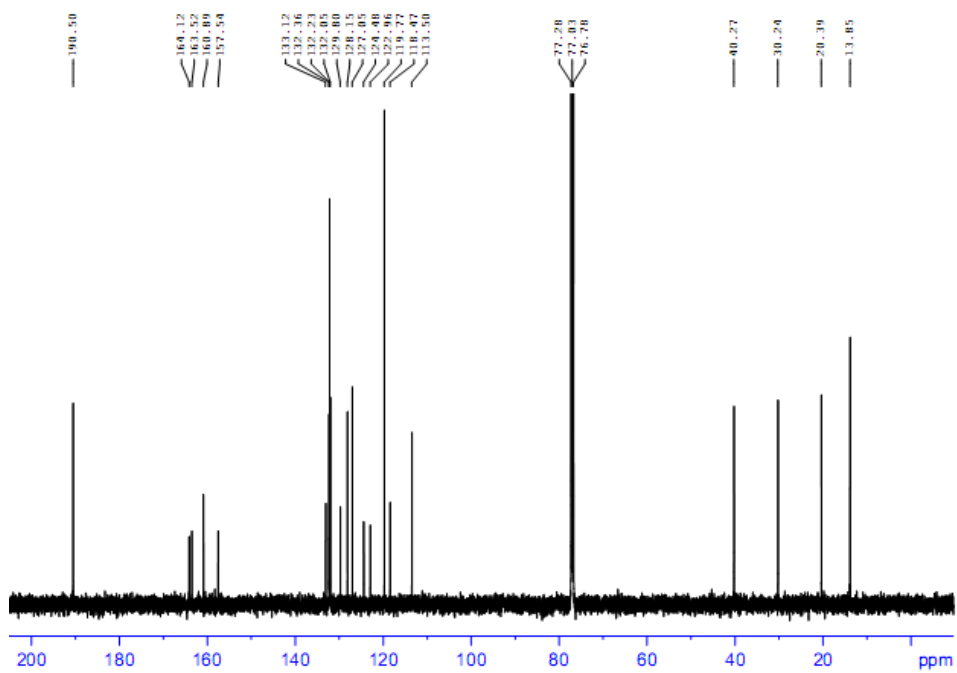

### 3. Supplementary spectral data

Fig. S13

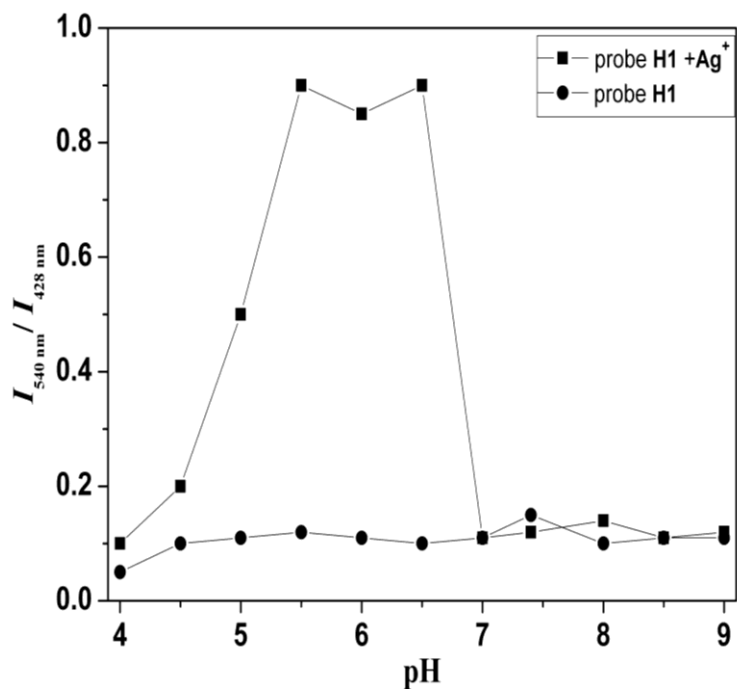

Fig. S14

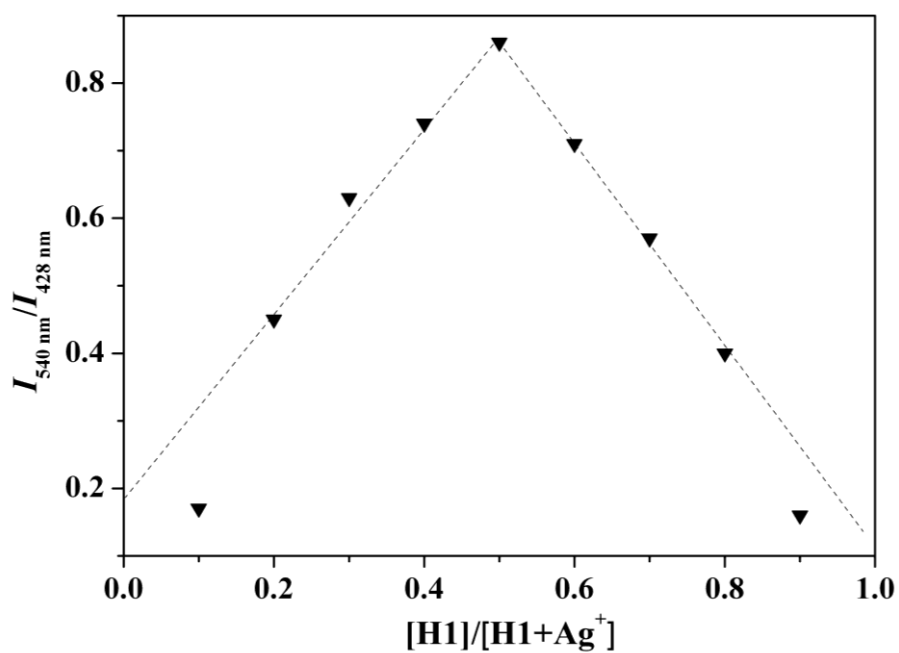

Fig. S15

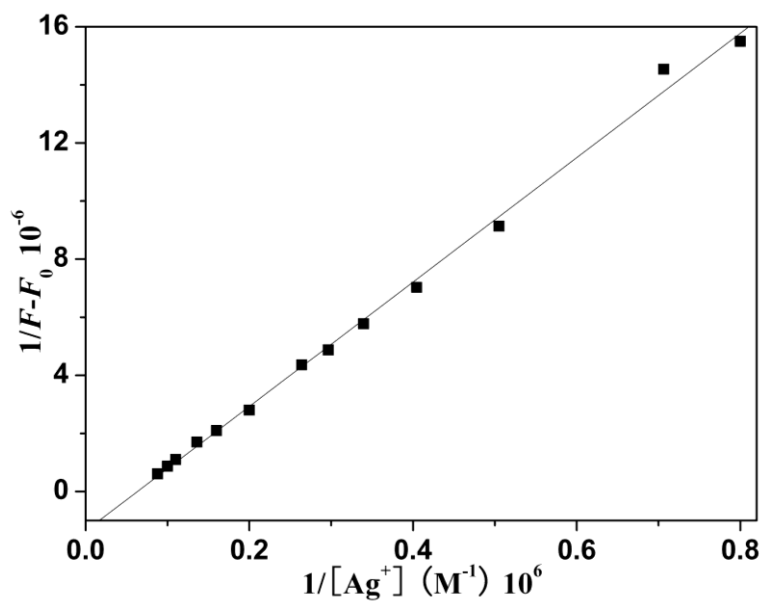

Fig. S16

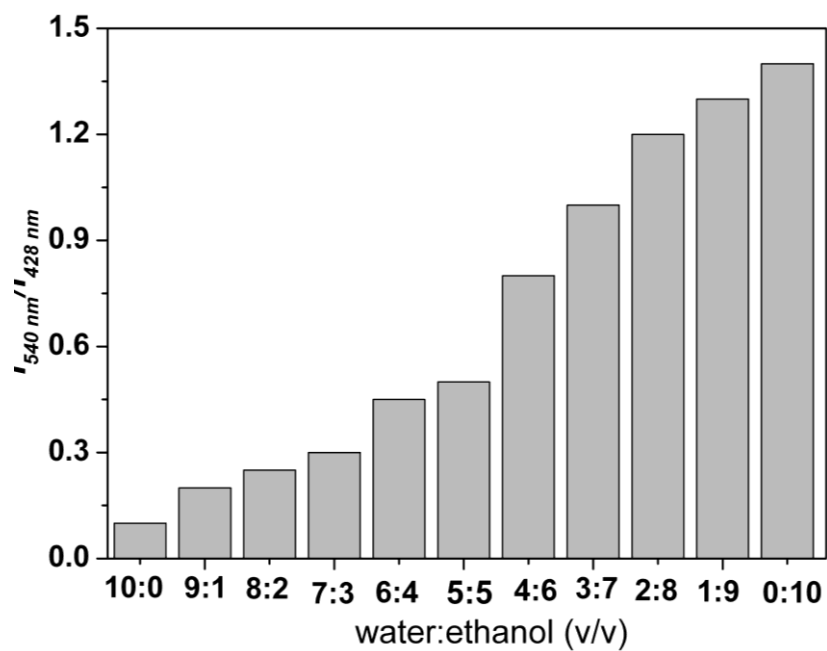

**Table 1**

| Real sample | Ag <sup>+</sup> (10 <sup>-6</sup> M) | Sum results (n=3) | Recovery (%) |
|-------------|--------------------------------------|-------------------|--------------|
|             | Added                                |                   |              |
| Tap water   | 0.9                                  | 0.81              | 90           |
|             | 3.0                                  | 3.6               | 120          |
|             | 5.0                                  | 4.8               | 96           |
